# Supplementary material
Source: PubMed Central journal article supplement (PMC4822995)
Supplement: NIHMS768613-supplement-Supplemental_materials.pdf [file NIHMS768613-supplement-Supplemental_materials.pdf]

**Supplemental Table 1.** Comparison of key features of the *First* and *Second Nutrition Report*

| Characteristic                                  | First report 2008 | Second report 2012                                                                                                                                                                                                    |
|-------------------------------------------------|-------------------|-----------------------------------------------------------------------------------------------------------------------------------------------------------------------------------------------------------------------|
| Years of NHANES covered                         | 1999–2002         | 2003–2006                                                                                                                                                                                                             |
| Number of nutrition biomarkers covered          | 27                | 58                                                                                                                                                                                                                    |
| Tables with concentrations by race/ethnic group | Yes               | Yes                                                                                                                                                                                                                   |
| Tables with central 95% reference intervals     | No                | Yes                                                                                                                                                                                                                   |
| Graphs representing age patterns                | No                | Yes                                                                                                                                                                                                                   |
| Tables and graphs with concentrations over time | No                | Yes (1999–2006)                                                                                                                                                                                                       |
| Tables with prevalence estimates                | No                | Yes                                                                                                                                                                                                                   |
| Tables with prevalence estimates over time      | No                | Yes (1999–2006)                                                                                                                                                                                                       |
| New indicators covered in the second report     |                   | Vitamin B-6 (pyridoxal-5'-phosphate and 4-pyridoxic acid)<br>Vitamin C<br>Iron status: soluble transferrin receptor and body iron<br>Fatty acids (saturated, mono-, polyunsaturated)<br>Acrylamide hemoglobin adducts |

**Supplemental Table 2.** Sample sizes for nutritional biomarkers by demographic subgroups for participants  $\geq 6$  y, NHANES 2003–2006

| <b>Biomarker (matrix)</b> | <b>6–11 y</b> | <b>20–39 y</b> | <b><math>\geq 60</math> y</b> | <b>MA</b> | <b>NHB</b> | <b>NHW</b> | <b>Males</b> | <b>Females</b> |
|---------------------------|---------------|----------------|-------------------------------|-----------|------------|------------|--------------|----------------|
| 25OHD (S)                 | 1768          | 3262           | 3071                          | 4275      | 4349       | 6698       | 8145         | 8459           |
| Folate (S)                | 1749          | 3242           | 3053                          | 4212      | 4297       | 6633       | 8050         | 8361           |
| Folate (RBC)              | 1779          | 3262           | 3069                          | 4304      | 4404       | 6675       | 8172         | 8498           |
| PLP (S)                   | 922           | 1699           | 1409                          | 2212      | 2157       | 3285       | 4055         | 4256           |
| Vitamin A (S)             | 860           | 1688           | 1387                          | 1844      | 1891       | 2973       | 3547         | 3707           |
| Vitamin B-12 (S)          | 1747          | 3214           | 3035                          | 4205      | 4285       | 6571       | 7999         | 8317           |
| Vitamin C (S)             | 1703          | 3233           | 3024                          | 3628      | 3784       | 6089       | 7155         | 7424           |
| Vitamin E (S)             | 860           | 1688           | 1387                          | 1844      | 1891       | 2973       | 3547         | 3707           |

<sup>1</sup> 25OHD, 25-hydroxyvitamin D; MA, Mexican American; NHB, non-Hispanic black; NHW, non-Hispanic white; PLP, pyridoxal-5'-phosphate; S, serum

**Supplemental Table 3.** Sample sizes for serum and RBC folate, serum 25-hydroxyvitamin D, and urine iodine by demographic subgroups for participants  $\geq 4$  y, NHANES 1988–2006

| <b>Biomarker</b>          | <b>All</b> | <b>Males</b> | <b>Females</b> | <b>Mexican<br/>American</b> | <b>Non-Hispanic<br/>black</b> | <b>Non-Hispanic<br/>white</b> |
|---------------------------|------------|--------------|----------------|-----------------------------|-------------------------------|-------------------------------|
| Serum folate              |            |              |                |                             |                               |                               |
| 1988–1994                 | 23705      | 11269        | 12436          | 7053                        | 6853                          | 8795                          |
| 1999–2002                 | 15653      | 7594         | 8059           | 4613                        | 3640                          | 6074                          |
| 2003–2006                 | 15331      | 7509         | 7822           | 3864                        | 3999                          | 6323                          |
| RBC folate                |            |              |                |                             |                               |                               |
| 1988–1994                 | 23404      | 11145        | 12259          | 6957                        | 6869                          | 8575                          |
| 1999–2002                 | 15827      | 7663         | 8164           | 4641                        | 3700                          | 6134                          |
| 2003–2006                 | 15451      | 7561         | 7890           | 3901                        | 4066                          | 6333                          |
| Serum 25OHD <sup>1</sup>  |            |              |                |                             |                               |                               |
| 1988–1994                 | 18883      | 8840         | 10043          | 5305                        | 5362                          | 7428                          |
| 2001–2002                 | 6816       | 3285         | 3531           | 1678                        | 1487                          | 3122                          |
| 2003–2006                 | 13037      | 6379         | 6658           | 3102                        | 3285                          | 5725                          |
| Urine iodine <sup>2</sup> |            |              |                |                             |                               |                               |
| 1988–1994                 | 22090      | 10558        | 11532          | 6448                        | 6622                          | 8091                          |
| 2001–2002                 | 2837       | 1333         | 1504           | 720                         | 670                           | 1222                          |
| 2003–2006                 | 5175       | 2477         | 2698           | 1320                        | 1363                          | 2085                          |

<sup>1</sup> 25OHD, 25-hydroxyvitamin D; data is limited to persons  $\geq 12$  y<sup>2</sup> Data is limited to persons  $\geq 6$  y

**Supplemental Table 4.** Sample sizes for serum vitamin B-6, vitamin D, and iron deficiency demographic subgroups for participants  $\geq 1$  y, NHANES 2003–2006

| <b>Demographic group</b> | <b>Vitamin B6<sup>1</sup></b> | <b>Vitamin D</b> | <b>Iron (Children)</b> | <b>Iron (Women)</b> |
|--------------------------|-------------------------------|------------------|------------------------|---------------------|
| Age, y                   |                               |                  |                        |                     |
| 1-5                      | 915                           | 1799             | 1369                   | NA                  |
| 6-11                     | 922                           | 1768             | NA                     | NA                  |
| 12-19                    | 1985                          | 4044             | NA                     | 1967                |
| 20-39                    | 1699                          | 3262             | NA                     | 1758                |
| 40-59                    | 1381                          | 2660             | NA                     | 751 <sup>2</sup>    |
| $\geq 60$                | 1409                          | 3071             | NA                     | NA                  |
| Sex                      |                               |                  |                        |                     |
| Males                    | 4055                          | 8145             | 695                    | NA                  |
| Females                  | 4256                          | 8459             | 674                    | 4476                |
| Race-ethnicity           |                               |                  |                        |                     |
| MA                       | 2212                          | 4275             | 422                    | 1219                |
| NHB                      | 2157                          | 4349             | 401                    | 1232                |
| NHW                      | 3285                          | 6698             | 385                    | 1656                |

<sup>1</sup> Available for NHANES 2005–2006 only

<sup>2</sup> Women 40–49 y

NA, not applicable

**Supplemental Figure 1.** Time trends of age-adjusted geometric mean concentrations in the US population, NHANES 1988-2006

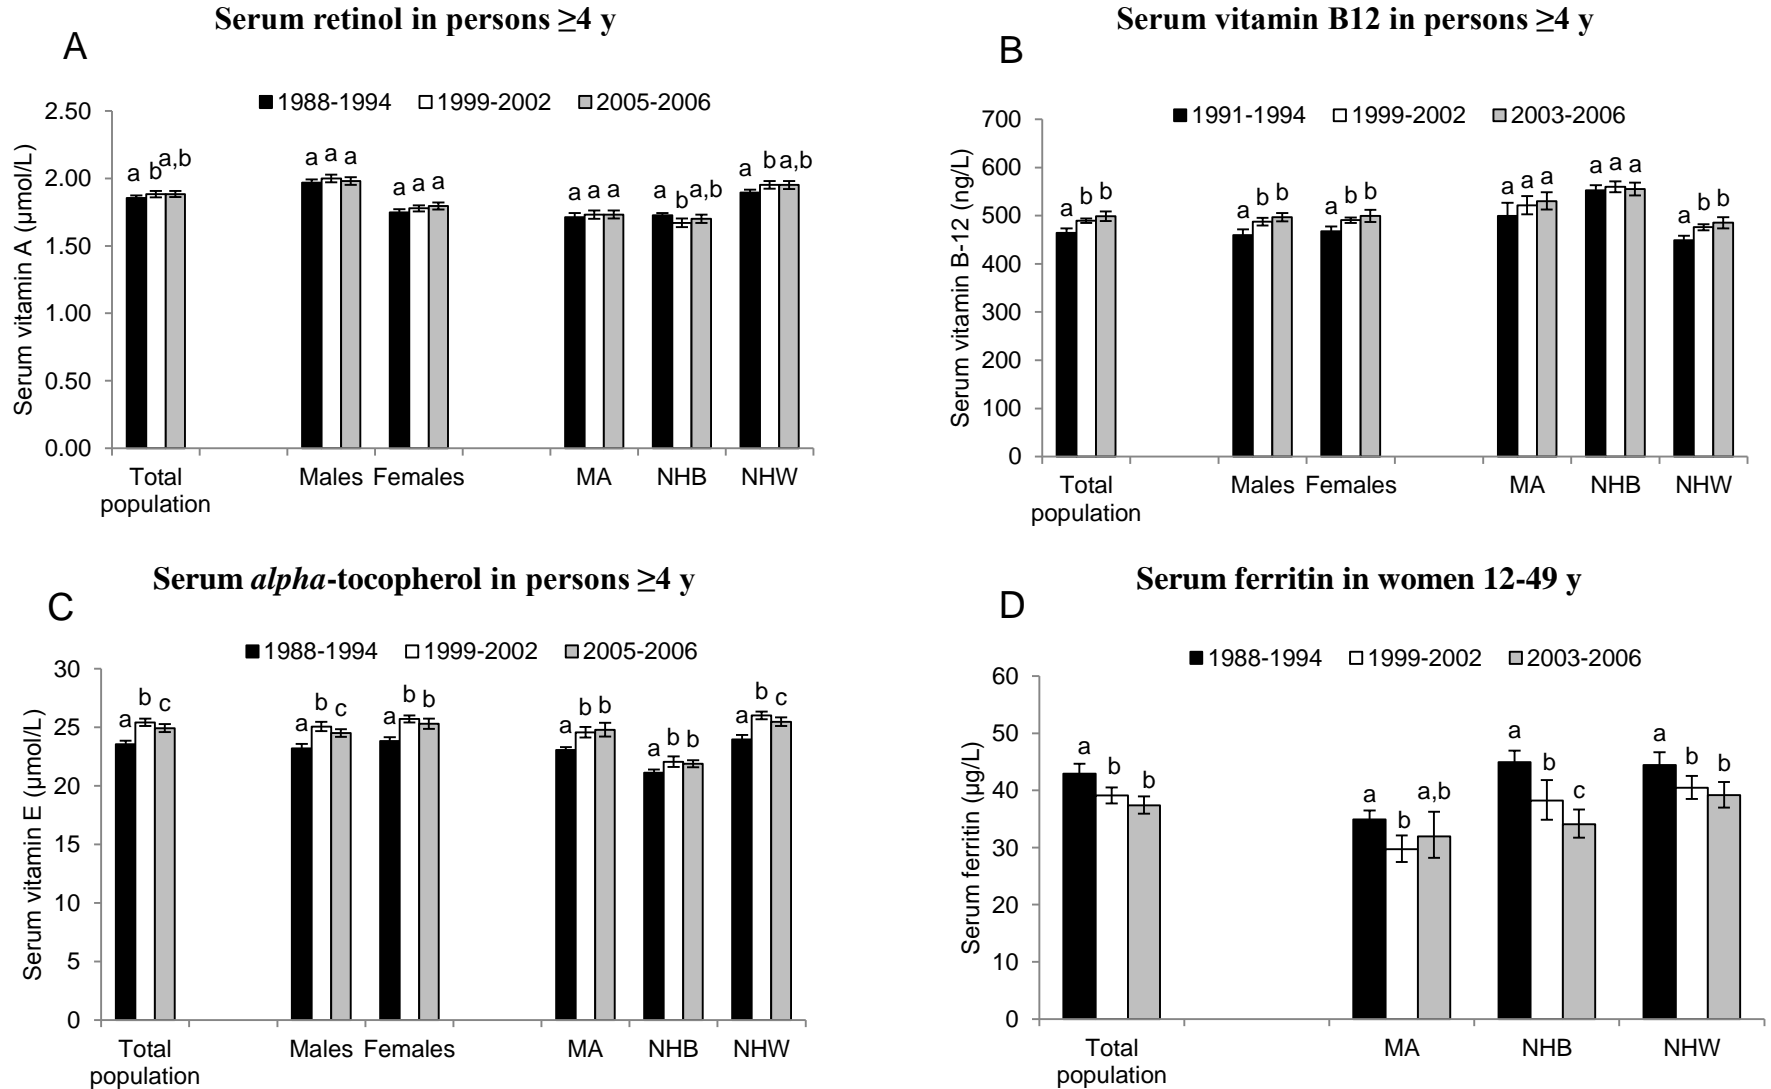

Legend: Error bars represent 95% confidence intervals. Within a demographic group, bars not sharing a common letter differ ( $P < 0.05$ ). Age adjustment was done using direct standardization. MA, Mexican American; NHB, non-Hispanic black; NHW, non-Hispanic white. SI conversion factors are as follows: vitamin B12,  $\times 0.738$  (nmol/L); ferritin,  $\times 2.247$  (pmol/L).
